# Supplementary material for: Augmented Reality PSMA-3D guided robotic pelvic lymph node dissection (PLND) in prostate cancer patients
Source: Research Square preprint supplement (doi:10.21203/rs.3.rs-6596179/v1), 2025-05-20
Supplement: Supplementary file 1 [file 23e5bbf8e5dabe9c6a088460.docx]

**Table 2** Perioperative surgical and oncological characteristics

| **Characteristic** | ***n* = 13** |
| --- | --- |
| Perioperative outcomes | |
| **Operative time (min)**, median (IQR) | 210 (185-280) |
| **PLND time (min), median (IQR)** | 75 (50-105) |
| **AR PSMA-3D model overlapping time during PLND (min), median (IQR)** | 21 (12-29) |
| **Blood loss (ml)**, median (IQR) | 150 (100-200) |
| **Intraoperative complications**, *n* (%) | 0 (0) |
| **30-days complications**, Clavien-Dindo 3, *n* (%) | 1 (7) |
| **Length of stay**, median (IQR) | 4 (4-5) |
| **Pathological ISUP grade group**, *n* (%) | |
| 3 | 1 (7) |
| 4 | 3 (23) |
| 5 | 9 (69) |
| **Pathological stage**, *n* (%) | |
| T2 | 2 (15) |
| T3a | 2 (15) |
| T3b | 8 (62) |
| T4 | 1 (7) |
| **Positive surgical margins**, *n* (%) | 5 (38.5) |
| **Variant histology**, *n* (%) | |
| Cribriform | 8 (61) |
| Glomeruloid | 4 (30) |
| **Pathologic Nodal staging**, *n* (%) | |
| pN1 | 9 (69) |
| **Patients with positive nodes in the PLND template** | 6 (46) |
| **Patients with positive nodes outside the PLND template** | 3 (23) |
| **Number of nodes removed, median (IQR)** | 18 (13-22) |
| **Number of positive nodes in pN1 patients, median (IQR)** | 2 (1-3) |
| **Size of lymph node metastasis, median (IQR)** | 9 (4- 15) |
| **Size of lymph node metastasis in region with LNM detected by AR-PSMA-3D guided PLND, median (IQR)** | 10 (5-17) |
| **Size of lymph node metastasis in region with LNM not detected by AR-PSMA-3D guided PLND, median (IQR)** | 5 (2-8) |
| **PSMA expression at HIC of LNM according to visual score, n (%)**  0  1+  2+  3+ | 0 (0)  0 (0)  0 (0)  31 (100) |
| **Follow up (months), median (IQR)** | 11 (9-22) |
| **PSA persistence, n (%)** | 5 (38) |
| **Postoperative pelvic RT and ADT, n (%)** | 9 (69.2) |

IQR = interquartile range; ISUP: International Society of Urological Pathology; PLND = pelvic lymph node dissection; LNM: lymph node metastases; AR-PSMA-3D: augmented reality-prostate specific membrane antigen-3 dimensional; PSMA: prostate specific membrane antigen; HIC: immunohistochemistry; PSA: prostate specific antigen; RT; radiotherapy; ADT: androgen deprivation therapy
