# Supplementary material for: Augmented Reality PSMA-3D guided robotic pelvic lymph node dissection (PLND) in prostate cancer patients
Source: Research Square preprint supplement (doi:10.21203/rs.3.rs-6596179/v1), 2025-05-20
Supplement: Supplementary file 2 [file 3cb55c6919e29fbe48b1c13f.docx]

| **Characteristics** | ***n* = 13** |
| --- | --- |
| **Age** (years), median (IQR) | 71 (63-75) |
| **BMI** (kg/m2), median (IQR) | 26.6 (22.5-28.7) |
|  | |
| **CCI** (age adjusted), median (IQR) | 6 (6-7) |
| **PSA at biopsy** (ng/ml), median (IQR) | 6.8 (5.6-7.4) |
| **PSA density** (MRI; ng/ml/ml), median (IQR) | 0.15 (0.11-0.26) |
| **Clinical stage (based on DRE)**, *n* (%) | |
| cT1 | 5 (38.5) |
| cT2 | 5 (38.5) |
| cT3 | 3 (23) |
| **MRI**, *n* (%) | |
| PIRADS 3 | 4 (30.7) |
| PIRADS 4 | 2 (15.4) |
| PIRADS 5 | 7 (53.8) |
| **MRI stage, n (%)** |  |
| Organ confined | 9 (69.2) |
| ECE/SVI | 4 (30.8) |
| **Biopsy ISUP grade group**, *n* (%) | |
| 3 | 1 (7.7) |
| 4 | 9 (69.2) |
| 5 | 3 (23.1) |
| **Risk of LNM according to the Briganti nomogram** (median, IQR) | 30 (20-63) |
| **PSMA-PET, no. of positive patients,** n (%) | |
| Prostate | 13 (100) |
| Obturator LN | 9 (69.2) |
| External iliac | 5 (38.4) |
| Internal iliac | 3 (23) |
| Common iliac | 1 (7.7) |
| Presacral | 3 (23) |
| miN1-2/miM1a outside ePLND template | 4 (30) |
| **PSMA-PET PROMISE v.2 STADIATION**  miN1  miN2  miM1a | 6 (46.2)  6 (46.2)  1 (7.7) |
| **Positive lymph nodes at PSMA-PET, Median (IQR)** | 1 (1-7) |

IQR = interquartile range; [BMI](https://www.sciencedirect.com/topics/medicine-and-dentistry/body-mass-index) = body mass index; CCI = [Charlson Comorbidity Index](https://www.sciencedirect.com/topics/medicine-and-dentistry/charlson-comorbidity-index); PSA = prostate-specific antigen; DRE= digital rectal examination; MRI = multiparametric resonance imaging; ECE/SVI: extracapsular extension/seminal vesicles invasion; ISUP: International Society of Urological Pathology; LNM = lymph node metastases; PSMA = prostate-specific membrane antigen; PET = positron emission tomography;

**Table 1** Preoperative patients characteristics
