# Supplementary material for: Augmented Reality PSMA-3D guided robotic pelvic lymph node dissection (PLND) in prostate cancer patients
Source: Research Square preprint supplement (doi:10.21203/rs.3.rs-6596179/v1), 2025-05-20
Supplement: Supplementary file 3 [file ea053104a994580a9e124132.docx]

**Table 3.** Preoperative PSMA-PET derived 3D model compared with final histopathologic evaluation in 13 patients treated with RARP and PLND

|  | **PSMA-PET based 3D model, site (number of positive nodes, SUVmax)** | **Pathology results, site (number; size of nodal metastasis)** | **PSMA expression at HIC of nodal metastases according to visual score (0-3)** | **First PSA (40 days after surgery)** |
| --- | --- | --- | --- | --- |
| **Patient 1** | EIR (1, 3.6); OR (1, 3) | EIR (2; 16 mm and 13 mm); EIL (1, 12 mm) | EIR (3+ and 3+); EIL (3+) | 0.54 ng/ml |
| **Patient 2** | OL (1, 13.3) | EIL (1; 5 mm) | EIL (3+) | 0.02 ng/ml |
| **Patient 3** | CIL (2, 3.9 – 4.6) | Negative | Negative | 0.12 ng/ml |
| **Patient 4** | OR (2, 2.3 – 3.5); OL (1, 2.7) | OL (8 mm) | OL (3+) | 0.02 ng/ml |
| **Patient 5** | PS (1, 7.5) | PS (1; 15 mm); OR (1, 5mm) | PS (3+); OR (3+) | 0.41 ng/ml |
| **Patient 6** | OR (1, 3.5) | OR (2; 9 mm and 5 mm) | OR (3+ and 3+) | 0.04 ng/ml |
| **Patient 7** | OR (1, 39.9); EIR (1, 39.7); PS (1, 70.3) | EIR (2; 9 mm and 10 mm); PS (1; 21 mm) | EIR (3+ and 3+); PS (3+) | 0.02 ng/ml |
| **Patient 8** | OR (1, 2.9) | Negative | Negative | 0.01 ng/ml |
| **Patient 9** | EIR (1, 3.4) | Negative | Negative | 0.04 ng/ml |
| **Patient 10** | OR (1, 3) | Negative | Negative | 0.01 ng/ml |
| **Patient 11** | IIL (1, 6.3); IIR (1, 6.3); PS (1, 14) | IIR (2; 17 mm and 14 mm); IIL (5; 15 mm, 5mm, 2mm, 1 mm and 4 mm); OR (2; 12 mm and 9 mm); OL (5;3 mm, 2mm, 4mm, 6mm and 4 mm); PS (1; 24mm); | IIR (3+ and 3+); IIL (3+,3+,3+,3+ and 3+); OR (3+ and 3+); OL (3+,3+,3+,3+ and 3+); PS (3+) | 6.57 ng/ml |
| **Patient 12** | EIR (1, 4.2); OR (1, 4); IIR (1, 4) | EIL (1; 3mm); EIR (2; 10 mm and 9 mm) | EIL (3+); EIR (3+ and 3+) | 0.16 ng/ml |
| **Patient 13** | EIL (1, 7.1) | EIL (1; 19 mm) | EIL (3+) | 0.02 ng/ml |

CIL = common iliac left; CIR = common iliac right; CT = computed tomography; EIL = external iliac left; EIR = external iliac right; PLND = pelvic lymph node dissection; IIL = internal iliac left; IIR = internal iliac right; OL = obturator left; OR = obturator right; PS = presacral; PSMA = prostate-specific membrane antigen; PET = positron emission tomography
