# Supplementary material for: Augmented Reality PSMA-3D guided robotic pelvic lymph node dissection (PLND) in prostate cancer patients
Source: Research Square preprint supplement (doi:10.21203/rs.3.rs-6596179/v1), 2025-05-20
Supplement: Supplementary file 4 [file f5ead7a2e5e1d479e3934d2a.docx]

**Table 4.** Contingency table and diagnostic accuracy on per-region analysis over

a total of 117 anatomical lymph nodal regions dissected

|  | **Pathology positive** | **Pathology negative** |
| --- | --- | --- |
| **PSMA positive 3D model** | 11 | 10 |
| **PSMA negative 3D model** | 5 | 91 |
| Sensitivity (%; 95% CI) | 69 (41- 88) | |
| Specificity (%; 95% CI) | 90 (82- 95) | |
| Positive predictive value (%; 95% CI) | 52 (30- 74) | |
| Negative predictive value (%; 95% CI) | 95 (88- 98) | |
| Accuracy (AUC) | 0.79 | |

PSMA = prostate-specific membrane antigen; 3D: 3 dimensional
